# Supplementary material for: Quality Evaluation of Shiitake Blanched and Centrifuged Broths as Functional Instant Drinks
Source: MDPI journal article supplement (doi:10.3390/foods12152925), 2023-08-01
Supplement: s1 [file s1]

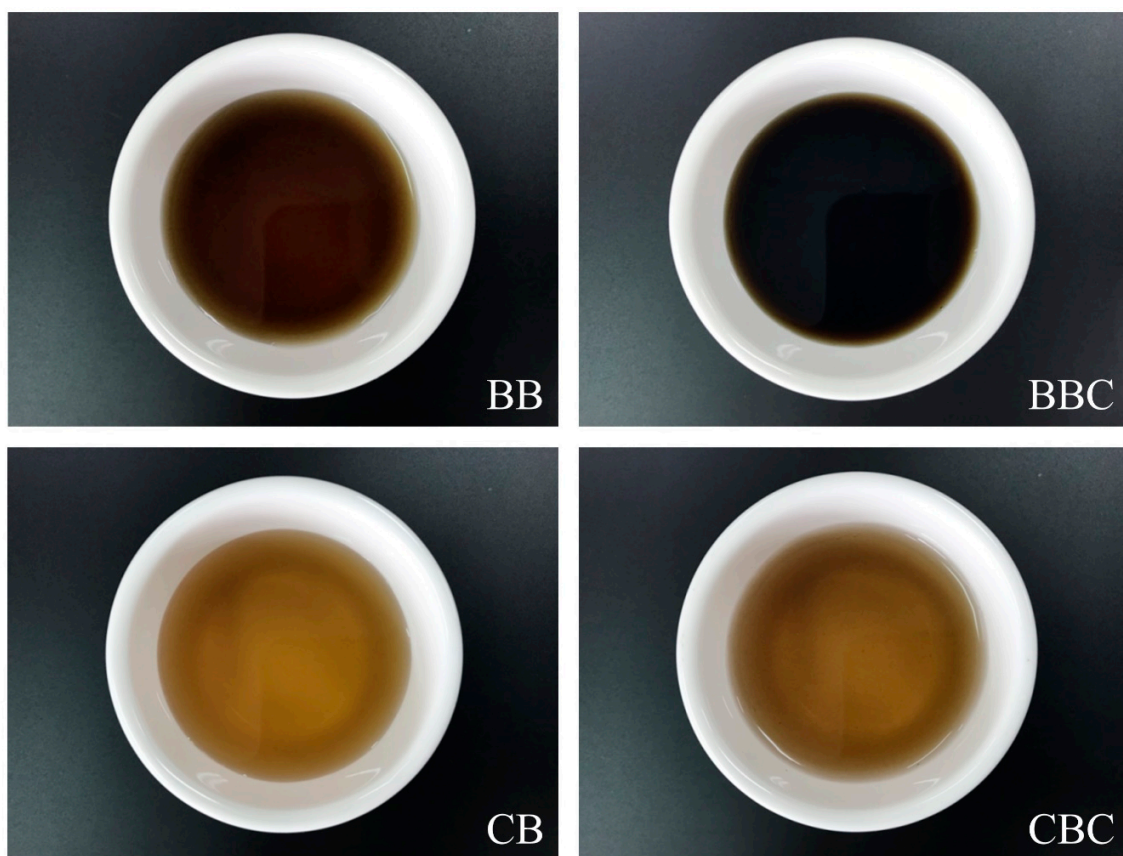

**Figure S1.** The color of blanded and centrifuged broths and their concentrates.

BB, Blanded broth. BBC, Blanded broth concentrate. CB, Centrifuged broth. CBC, Centrifuged broth concentrate.

**Table S1.** Moisture, water activity and color property of instant drink powders.

|                           | FS-2 <sup>1</sup>         | BB-SD13        | BB-SD14        | BB-SD15        | CB-SD13        | CB-SD14        | CB-SD15        |
|---------------------------|---------------------------|----------------|----------------|----------------|----------------|----------------|----------------|
| Moisture (%)              | 1.73 ± 0.03f <sup>2</sup> | 7.06 ± 0.05a   | 5.47 ± 0.01b   | 4.41 ± 0.05c   | 3.55 ± 0.06d   | 2.06 ± 0.05e   | 1.72 ± 0.01f   |
| Water activity            | 0.225 ± 0.002e            | 0.365 ± 0.015a | 0.328 ± 0.002b | 0.315 ± 0.003c | 0.307 ± 0.001c | 0.277 ± 0.001d | 0.226 ± 0.001e |
| Color property            |                           |                |                |                |                |                |                |
| <i>L</i> <sup>*</sup>     | 95.51 ± 0.11a             | 86.88 ± 0.60g  | 89.16 ± 0.19f  | 89.81 ± 0.17e  | 91.65 ± 0.08d  | 92.28 ± 0.10c  | 92.81 ± 0.18b  |
| <i>a</i> <sup>*</sup>     | -0.61 ± 0.02d             | 0.44 ± 0.02a   | 0.14 ± 0.02b   | -0.03 ± 0.03c  | -0.60 ± 0.02d  | -0.61 ± 0.02d  | -0.62 ± 0.01d  |
| <i>b</i> <sup>*</sup>     | 3.31 ± 0.03g              | 10.62 ± 0.15a  | 8.95 ± 0.11b   | 8.18 ± 0.13d   | 8.55 ± 0.14c   | 7.75 ± 0.02e   | 7.15 ± 0.04f   |
| <i>WI</i> <sup>*</sup>    | 94.39 ± 0.07a             | 83.11 ± 0.39g  | 85.94 ± 0.17f  | 86.93 ± 0.07e  | 88.03 ± 0.05d  | 89.04 ± 0.08c  | 89.84 ± 0.10b  |
| $\Delta E$ <sup>*</sup>   |                           | 11.36 ± 0.38a  | 8.53 ± 0.16b   | 7.52 ± 0.06c   | 6.51 ± 0.07d   | 5.49 ± 0.07e   | 4.70 ± 0.07f   |
| Hedonic test <sup>3</sup> |                           | 7.4 ± 1.1a     | 7.6 ± 1.1a     | 7.4 ± 1.0a     | 7.4 ± 0.8a     | 7.6 ± 0.9a     | 7.6 ± 0.9a     |

<sup>1</sup>FS-2: Fibersol-2. SD: Spray drying. 13, 14, and 15: dry solids of blanched broth (or centrifuged broth) concentrate/indigestible dextrin (w/w).

<sup>2</sup>Each value is expressed as mean ± standard deviation (n = 3). Values with different lowercase letters within a row differ significantly (p < 0.05).

<sup>3</sup>Hedonic test: each value is expressed as mean ± standard deviation (n = 90). Values with different lowercase letters within a row differ significantly (p < 0.05). Nine-point hedonic scale with 1, 5, and 9 representing extremely dislike, neither like nor dislike, and extremely like, respectively.

**Table S2.** Color property of instant drinks prepared from instant drink powders with hot water.

|                          | $L^*$                      | $a^*$         | $b^*$         | $h (^\circ)^*$ | $c^*$         | $\Delta E$    |
|--------------------------|----------------------------|---------------|---------------|----------------|---------------|---------------|
| Blanched broth           |                            |               |               |                |               |               |
| BB-SD13-1.0 <sup>1</sup> | 90.84 ± 0.07A <sup>2</sup> | -0.75 ± 0.05F | 25.98 ± 0.06F | 91.65 ± 0.11A  | 25.99 ± 0.06F |               |
| BB-SD13-1.5              | 86.79 ± 0.06B              | 0.51 ± 0.02E  | 35.94 ± 0.05E | 89.19 ± 0.01B  | 35.94 ± 0.05E | 10.82 ± 0.07E |
| BB-SD13-2.0              | 82.80 ± 0.02C              | 2.45 ± 0.02D  | 44.55 ± 0.06D | 86.85 ± 0.02C  | 44.62 ± 0.06D | 20.48 ± 0.06D |
| BB-SD13-2.5              | 79.06 ± 0.03D              | 4.78 ± 0.02C  | 51.41 ± 0.06C | 84.68 ± 0.02D  | 51.64 ± 0.06C | 28.57 ± 0.07C |
| BB-SD13-3.0              | 75.67 ± 0.03E              | 7.15 ± 0.02B  | 56.82 ± 0.06B | 82.82 ± 0.01E  | 57.27 ± 0.06B | 35.26 ± 0.06B |
| BB-SD13-3.5              | 73.14 ± 0.07F              | 9.15 ± 0.04A  | 60.34 ± 0.05A | 81.38 ± 0.03F  | 61.03 ± 0.05A | 39.89 ± 0.05A |
| BB-SD14-1.0              | 90.75 ± 0.04A              | -0.80 ± 0.01F | 26.39 ± 0.04F | 91.73 ± 0.01A  | 26.40 ± 0.04F |               |
| BB-SD14-1.5              | 86.78 ± 0.01B              | 0.48 ± 0.01E  | 36.13 ± 0.06E | 89.24 ± 0.01B  | 36.13 ± 0.06E | 10.59 ± 0.05E |
| BB-SD14-2.0              | 83.05 ± 0.03C              | 2.32 ± 0.04D  | 44.23 ± 0.14D | 86.99 ± 0.04C  | 44.29 ± 0.14D | 19.68 ± 0.14D |
| BB-SD14-2.5              | 79.35 ± 0.01D              | 4.64 ± 0.01C  | 51.04 ± 0.05C | 84.80 ± 0.01D  | 51.25 ± 0.05C | 27.69 ± 0.04C |
| BB-SD14-3.0              | 75.87 ± 0.06E              | 7.07 ± 0.04B  | 56.49 ± 0.08B | 82.87 ± 0.03E  | 56.93 ± 0.08B | 34.49 ± 0.10B |
| BB-SD14-3.5              | 72.77 ± 0.05F              | 9.36 ± 0.05A  | 60.48 ± 0.08A | 81.20 ± 0.04F  | 61.20 ± 0.08A | 39.86 ± 0.10A |
| BB-SD15-1.0              | 88.41 ± 0.01A              | -0.18 ± 0.01F | 33.10 ± 0.03F | 90.31 ± 0.01A  | 33.10 ± 0.03F |               |
| BB-SD15-1.5              | 86.62 ± 0.36B              | 0.60 ± 0.15E  | 37.19 ± 0.86E | 89.08 ± 0.21B  | 37.19 ± 0.86E | 4.53 ± 0.94E  |
| BB-SD15-2.0              | 82.23 ± 0.08C              | 2.88 ± 0.02D  | 46.54 ± 0.02D | 86.46 ± 0.03C  | 46.64 ± 0.02D | 15.11 ± 0.04D |
| BB-SD15-2.5              | 78.41 ± 0.06D              | 5.35 ± 0.04C  | 53.43 ± 0.07C | 84.28 ± 0.04D  | 53.69 ± 0.07C | 23.32 ± 0.09C |
| BB-SD15-3.0              | 74.26 ± 0.01E              | 8.39 ± 0.02B  | 59.34 ± 0.04B | 81.95 ± 0.02E  | 59.93 ± 0.04B | 31.03 ± 0.03B |
| BB-SD15-3.5              | 71.78 ± 0.38F              | 10.09 ± 0.01A | 62.12 ± 0.53A | 80.77 ± 0.08F  | 62.94 ± 0.52A | 35.00 ± 0.62A |
| Centrifuged broth        |                            |               |               |                |               |               |
| CB-SD13-1.0              | 96.89 ± 0.02A              | -2.17 ± 0.01C | 14.71 ± 0.02F | 98.40 ± 0.02A  | 14.87 ± 0.02F |               |
| CB-SD13-1.5              | 95.33 ± 0.02B              | -2.60 ± 0.01E | 21.06 ± 0.04E | 97.03 ± 0.01B  | 21.22 ± 0.04E | 6.55 ± 0.04E  |
| CB-SD13-2.0              | 93.71 ± 0.01C              | -2.80 ± 0.01F | 27.32 ± 0.05D | 95.85 ± 0.01C  | 27.46 ± 0.05D | 13.02 ± 0.05D |
| CB-SD13-2.5              | 92.28 ± 0.01D              | -2.56 ± 0.01D | 32.30 ± 0.04C | 94.54 ± 0.02D  | 32.40 ± 0.04C | 18.19 ± 0.04C |
| CB-SD13-3.0              | 90.68 ± 0.02E              | -1.98 ± 0.01B | 37.27 ± 0.03B | 93.04 ± 0.01E  | 37.32 ± 0.03B | 23.40 ± 0.04B |
| CB-SD13-3.5              | 88.85 ± 0.03F              | -1.20 ± 0.01A | 43.23 ± 0.12A | 91.59 ± 0.02F  | 43.25 ± 0.12A | 29.65 ± 0.12A |
| CB-SD14-1.0              | 96.85 ± 0.06A              | -2.23 ± 0.01C | 14.94 ± 0.05F | 98.50 ± 0.01A  | 15.10 ± 0.05F |               |
| CB-SD14-1.5              | 95.19 ± 0.03B              | -2.66 ± 0.04E | 21.40 ± 0.21E | 97.08 ± 0.04B  | 21.56 ± 0.21E | 6.68 ± 0.21E  |
| CB-SD14-2.0              | 93.63 ± 0.01C              | -2.72 ± 0.02F | 27.57 ± 0.08D | 95.63 ± 0.02C  | 27.70 ± 0.08D | 13.05 ± 0.08D |
| CB-SD14-2.5              | 92.07 ± 0.01D              | -2.54 ± 0.01D | 33.43 ± 0.13C | 94.35 ± 0.01D  | 33.53 ± 0.13C | 19.11 ± 0.12C |
| CB-SD14-3.0              | 90.41 ± 0.03E              | -1.97 ± 0.01B | 38.77 ± 0.11B | 92.90 ± 0.01E  | 38.82 ± 0.11B | 24.69 ± 0.11B |
| CB-SD14-3.5              | 88.81 ± 0.01F              | -1.27 ± 0.03A | 43.99 ± 0.24A | 91.66 ± 0.03F  | 44.01 ± 0.24A | 30.16 ± 0.23A |
| CB-SD15-1.0              | 96.55 ± 0.01A              | -2.26 ± 0.01C | 15.79 ± 0.02F | 98.16 ± 0.02A  | 15.95 ± 0.02F |               |

|             |               |                |               |               |               |               |
|-------------|---------------|----------------|---------------|---------------|---------------|---------------|
| CB-SD15-1.5 | 95.05 ± 0.36B | -2.68 ± 0.06DE | 22.25 ± 1.40E | 96.88 ± 0.29B | 22.41 ± 1.39E | 6.65 ± 1.44E  |
| CB-SD15-2.0 | 93.62 ± 0.02C | -2.79 ± 0.01E  | 27.86 ± 0.06D | 95.71 ± 0.01C | 28.00 ± 0.06D | 12.44 ± 0.06D |
| CB-SD15-2.5 | 92.00 ± 0.02D | -2.57 ± 0.01D  | 34.00 ± 0.13C | 94.33 ± 0.01D | 34.10 ± 0.13C | 18.78 ± 0.13C |
| CB-SD15-3.0 | 90.11 ± 0.25E | -1.96 ± 0.10B  | 40.20 ± 0.70B | 92.80 ± 0.19E | 40.25 ± 0.69B | 25.25 ± 0.74B |
| CB-SD15-3.5 | 89.13 ± 0.44F | -1.55 ± 0.22A  | 43.83 ± 1.36A | 92.03 ± 0.36F | 43.86 ± 1.35A | 29.02 ± 1.43A |

<sup>1</sup>SD: Spray drying. 13, 14, and 15: dry solid of blanched broth (or centrifuged broth) concentrate/indigestible dextrin (w/w). 1.0, 1.5, 2.0, 2.5, 3.0, and 3.5: instant drinks containing 1.0%, 1.5%, 2.0%, 2.5%, 3.0%, and 3.5% dried broth, respectively.

<sup>2</sup>Each value is expressed as mean ± standard deviation (n = 3). Values with different capital letters within a column differ significantly different (p < 0.05).
